# Supplementary material for: Antioxidants Isolated from Elaeagnus umbellata (Thunb.) Protect against Bacterial Infections and Diabetes in Streptozotocin-Induced Diabetic Rat Model
Source: MDPI journal article supplement (doi:10.3390/molecules26154464), 2021-07-24
Supplement: s1 [file s1]

Supplementary file

# Antioxidants Isolated from *Elaeagnus umbellata* (Thunb.) Protect Against Bacterial Infections and Diabetes in Streptozotocin-Induced Diabetic Rat Model

Nausheen Nazir <sup>1,\*</sup>, Muhammad Zahoor <sup>1,\*</sup>, Mohammad Nisar <sup>2</sup>, Imran Khan <sup>3</sup>, Riaz Ullah <sup>4</sup> and Amal Alotaibi <sup>5,\*</sup>

<sup>1</sup> Department of Biochemistry, University of Malakand, Chakdara 18800, Khyber Pakhtunkhwa, Pakistan; nausheen.nazir@uom.edu.pk

<sup>2</sup> Department of Botany, University of Malakand, Chakdara 18800, Khyber Pakhtunkhwa, Pakistan; mnshaalpk@yahoo.com

<sup>3</sup> Department of Pharmacy, University of Swabi, Anbar 94604, Khyber Pakhtunkhwa, Pakistan; drimran.khan@hotmail.com

<sup>4</sup> Department of Pharmacognosy, (MAPPRC), College of Pharmacy, King Saud University, Riyadh 11451, Saudi Arabia; rullah@ksu.edu.sa

<sup>5</sup> Basic Science Department, College of Medicine, Princess Nourah bint Abdulrahman University, Riyadh 11671, Saudi Arabia

\* Correspondence: authors: mohammadzahoorus@yahoo.com (M.Z.); amaalotaibi@pnu.edu.sa (A.A.)

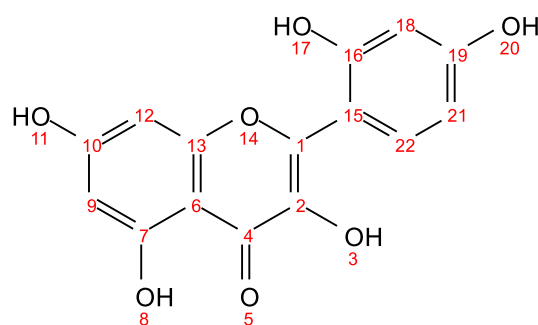

**Figure S1.** Structural formula of compound-I (Morin).

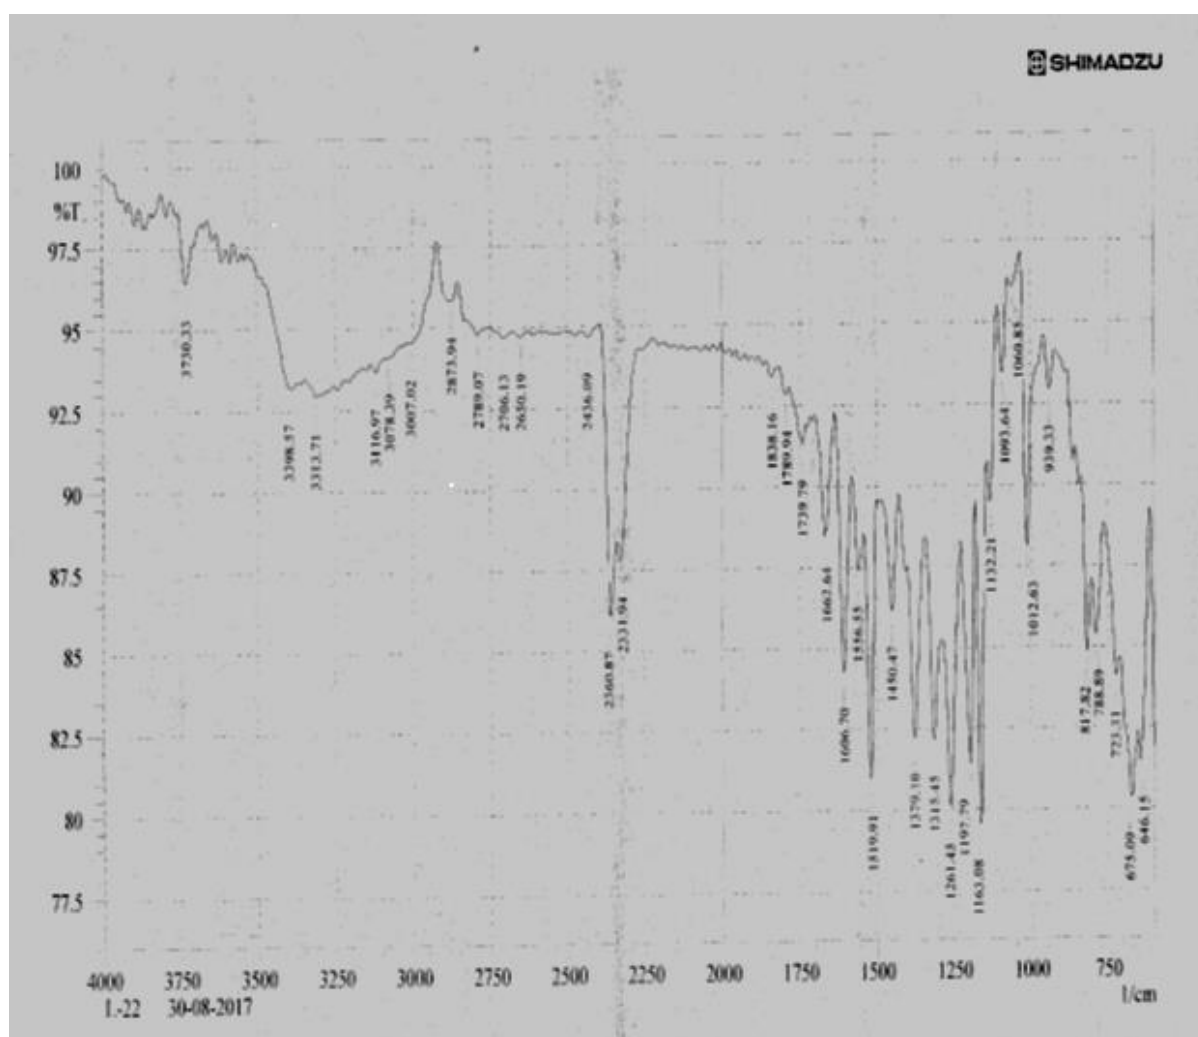

Figure S2. FTIR spectra of compound-I (Morin).

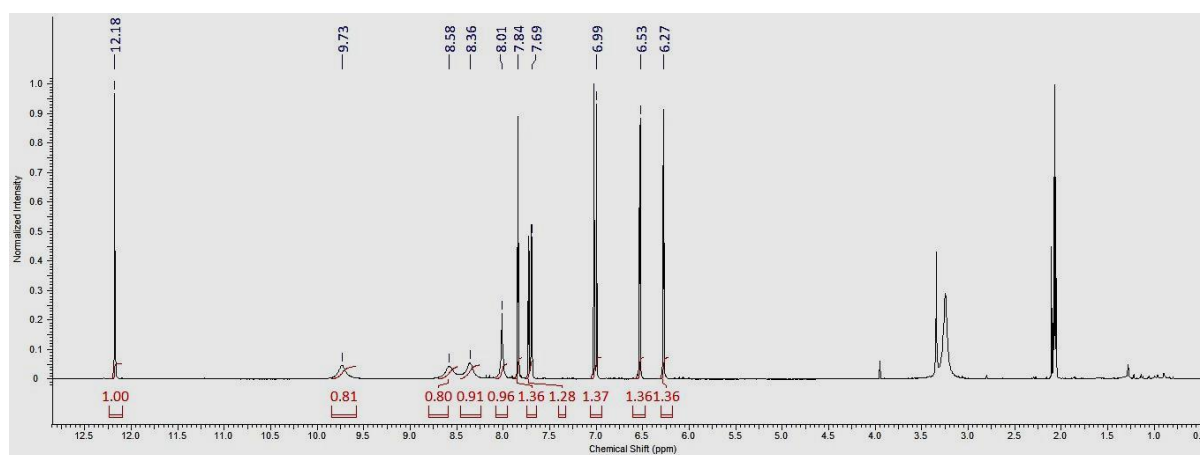Figure S3.  $^1\text{H}$  NMR (Acetone, 300MHz) of compound-I (Morin).

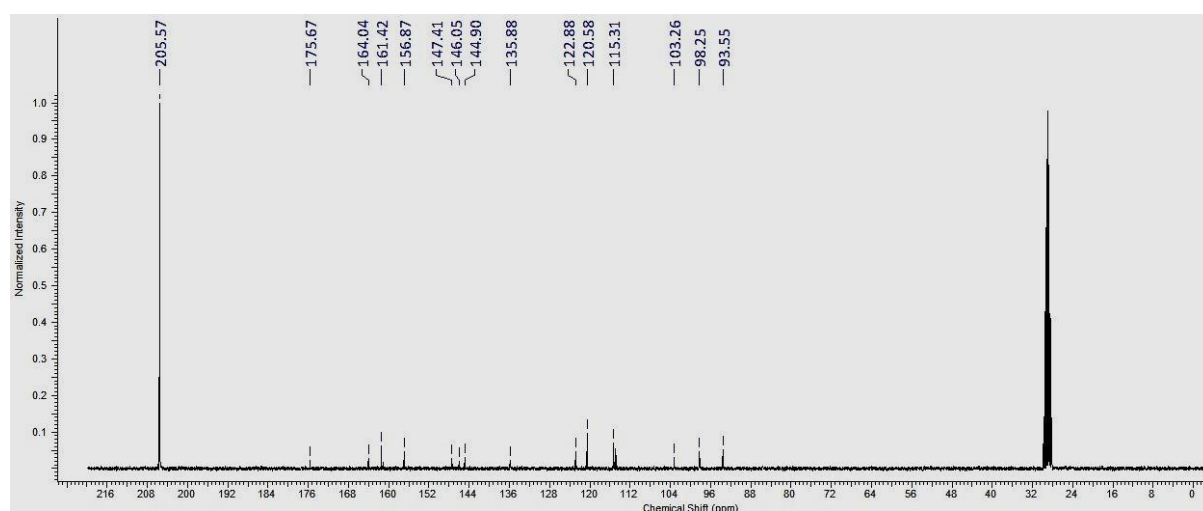

Figure S4.  $^{13}\text{C}$  NMR (Acetone, 75MHz) of compound-I (Morin).

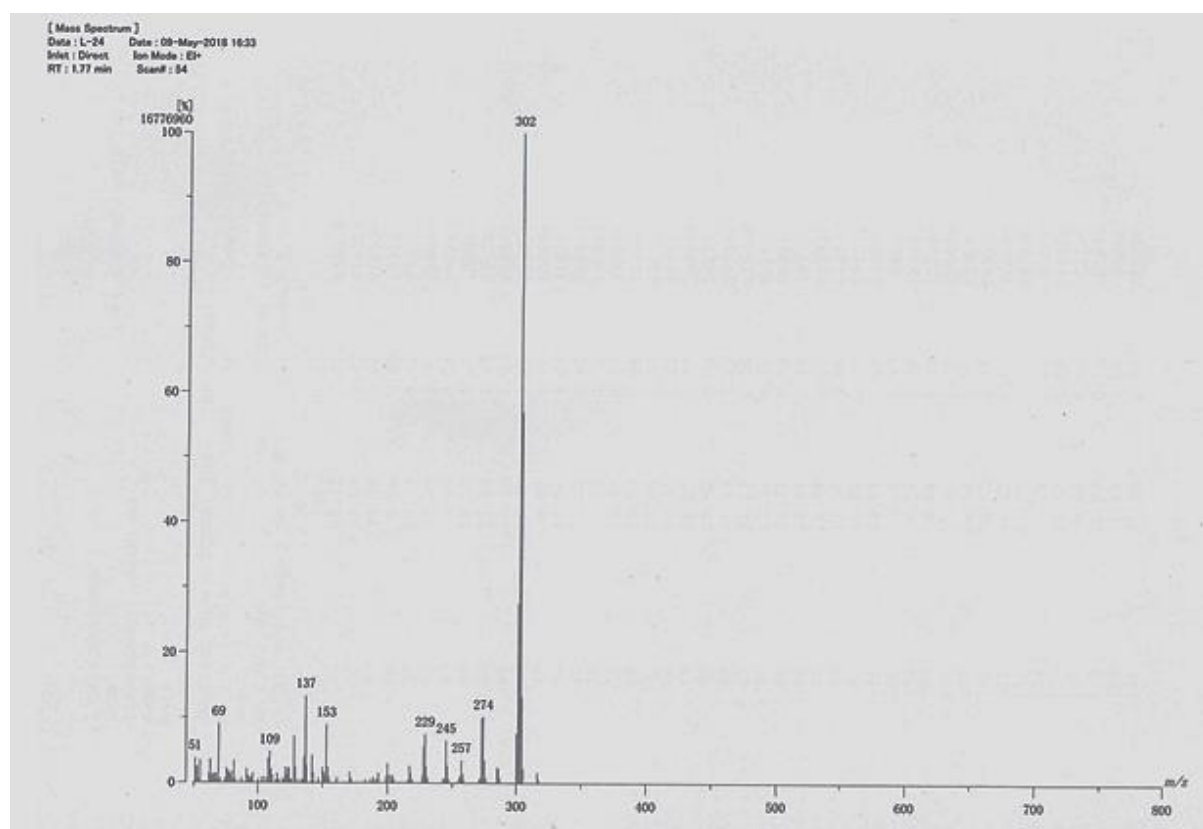

Figure S5. EIMS of compound-I (Morin).

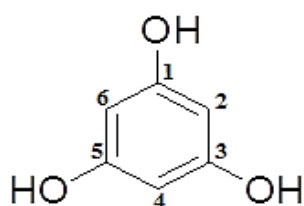

Figure S6. Structural formula of compound-II (Phloroglucinol).

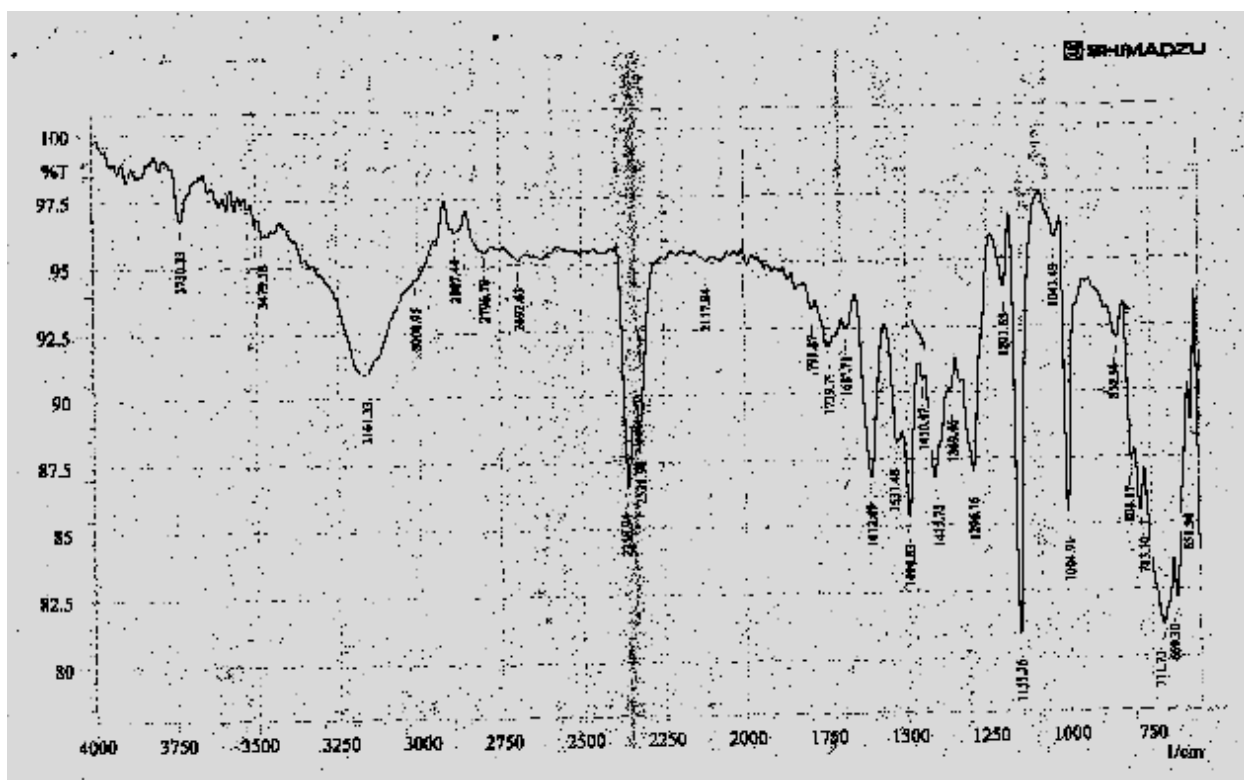

Figure S7. FTIR spectra of compound-II (Phloroglucinol).

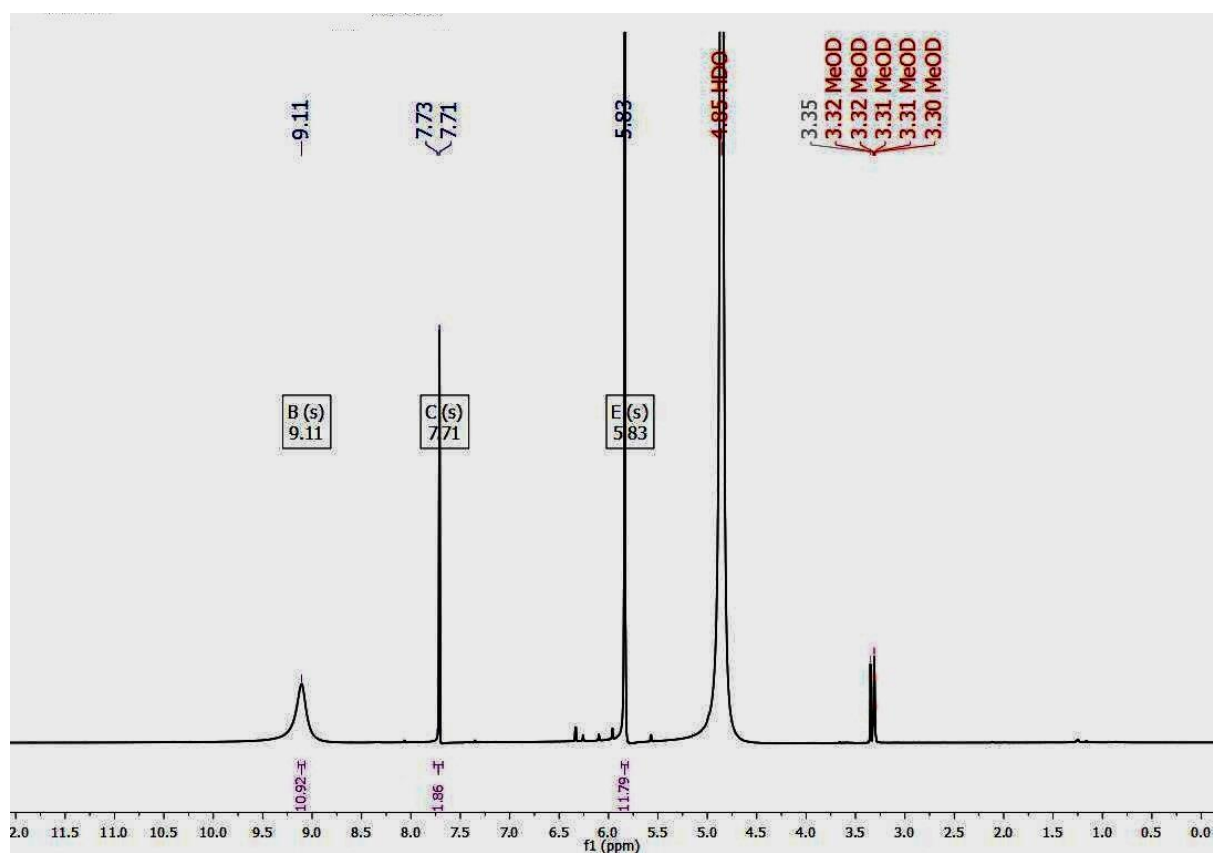

Figure S8. <sup>1</sup>H- (Methanol, 500 MHz) of compound-II (Phloroglucinol).

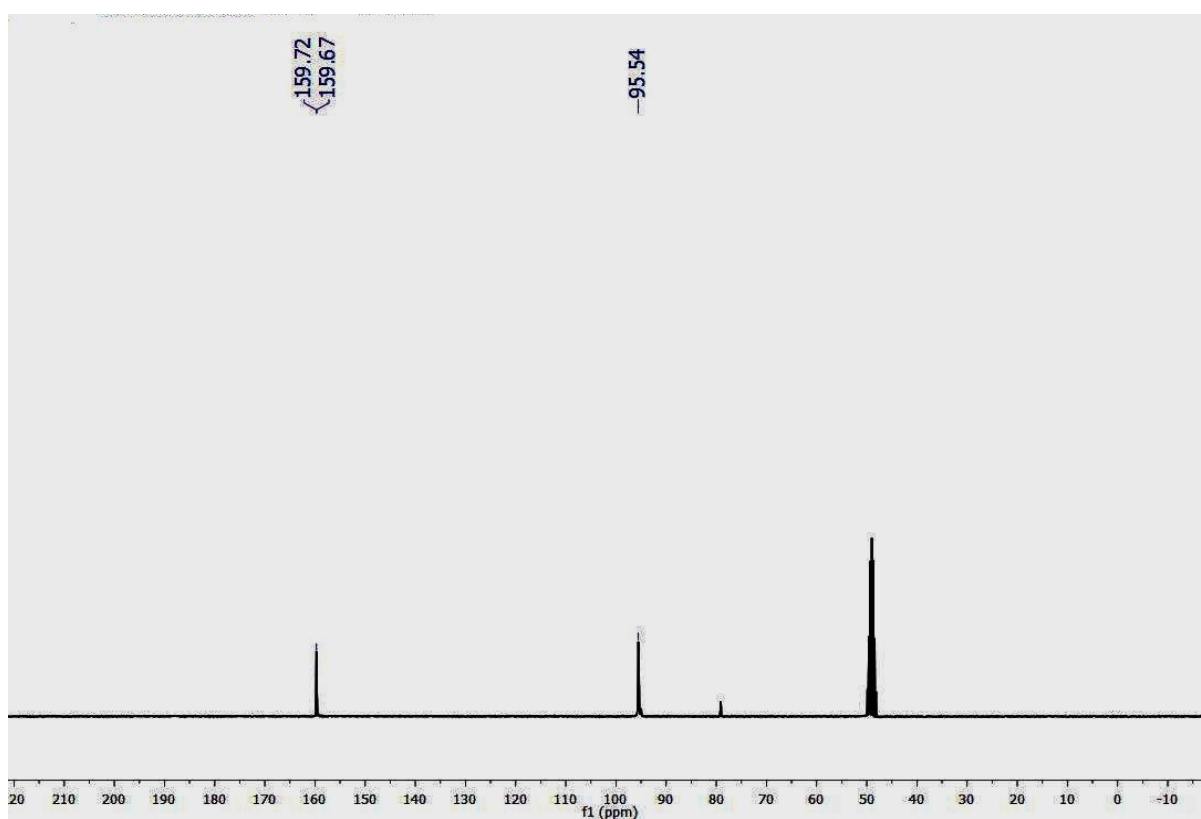

Figure S9. <sup>13</sup>C-NMR (Methanol, 126 MHz) of compound-II (Phloroglucinol).

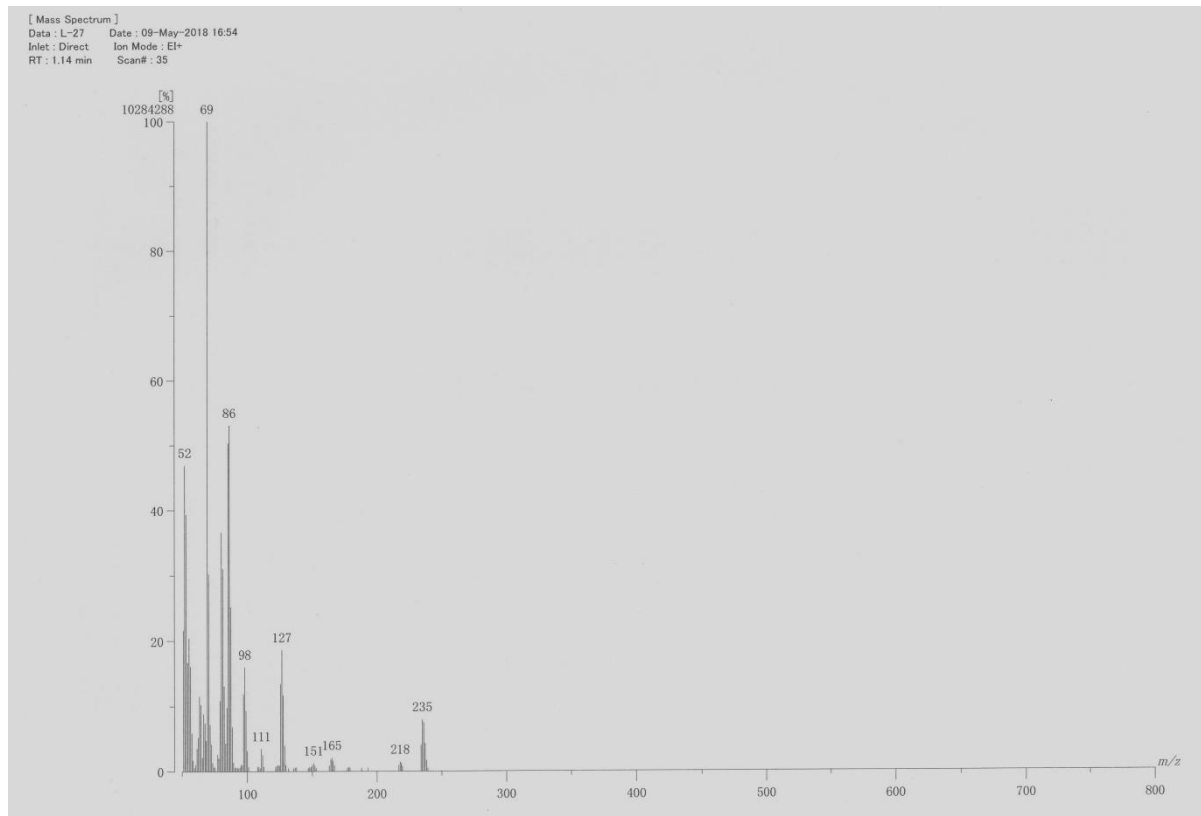

Figure S10. EI-MS Mass of compound-II (Phloroglucinol).

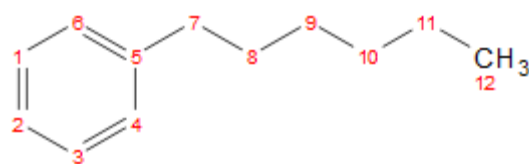

Figure S11. Structural formula of compound-III (1-Hexyl benzene).

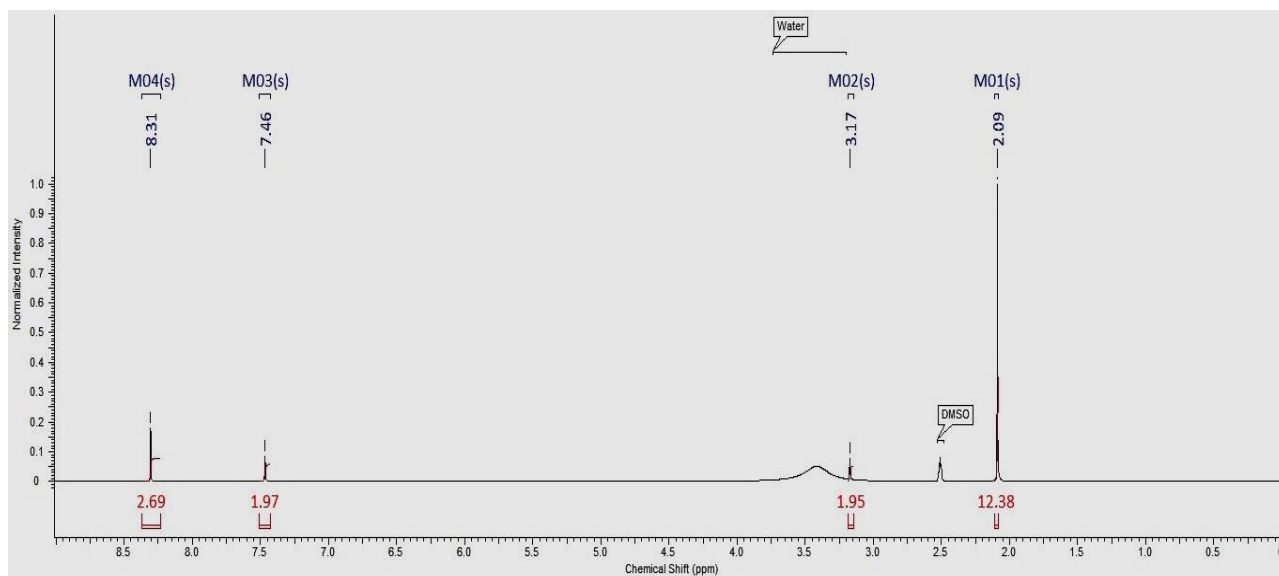

Figure S12. <sup>1</sup>H NMR (DMSO- H<sub>2</sub>O, 300MHz) of compound-III (1-Hexyl benzene).

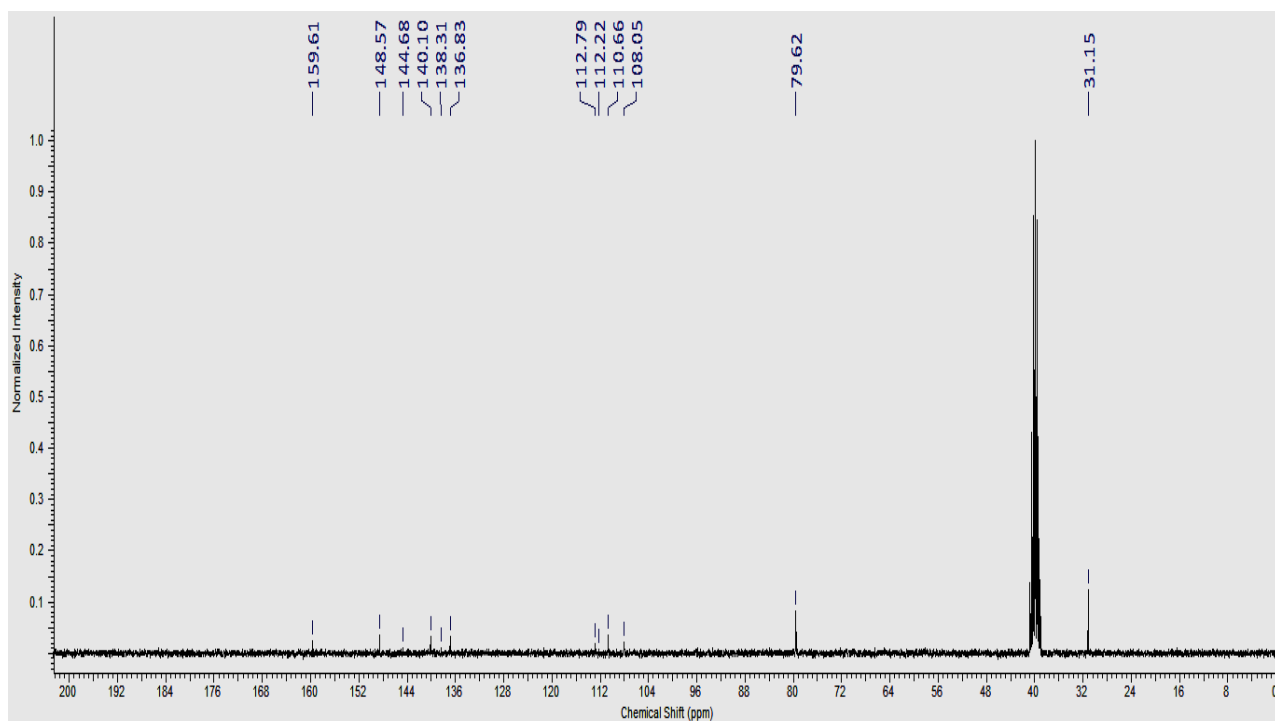

Figure S13. <sup>13</sup>C NMR (DMSO-*d*<sub>6</sub>, 75MHz) of compound-III (1-Hexyl benzene).

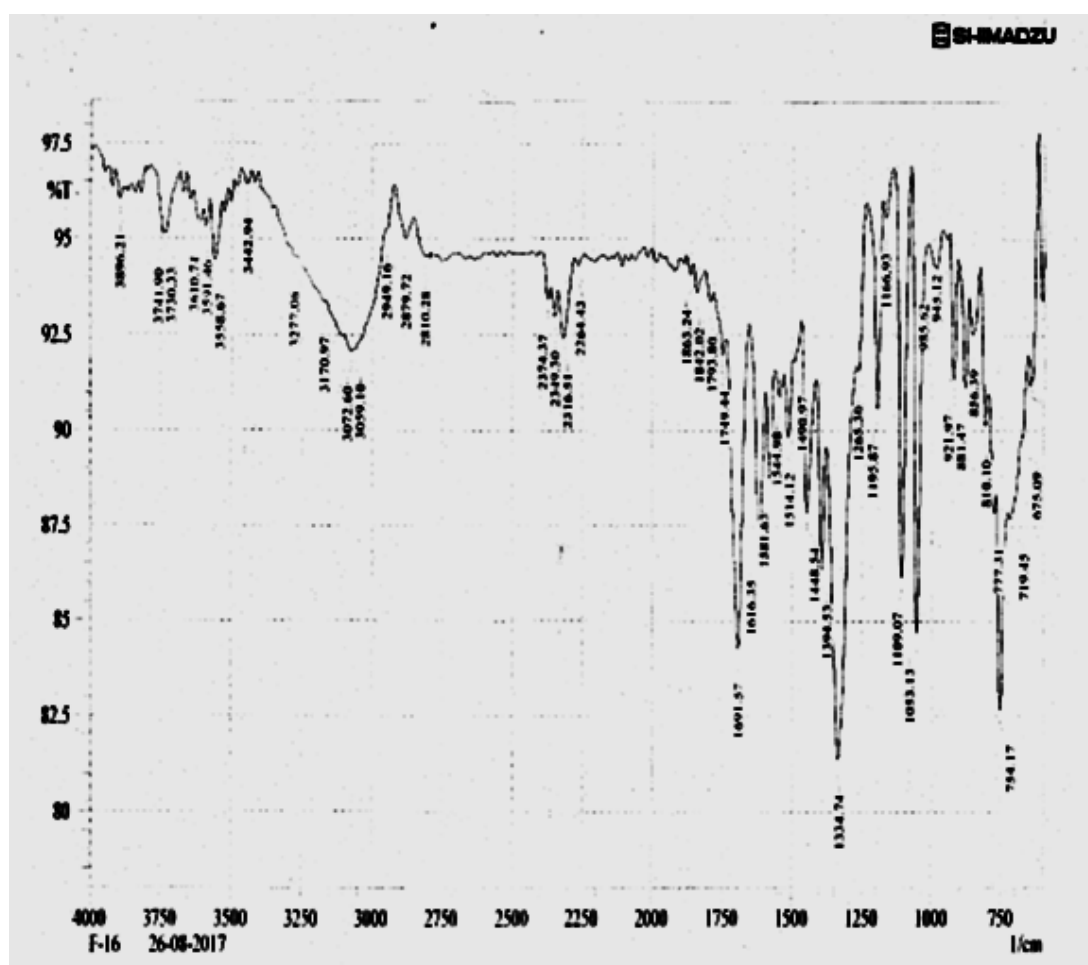

Figure S14. FTIR spectra of compound-III (1-Hexyl benzene).

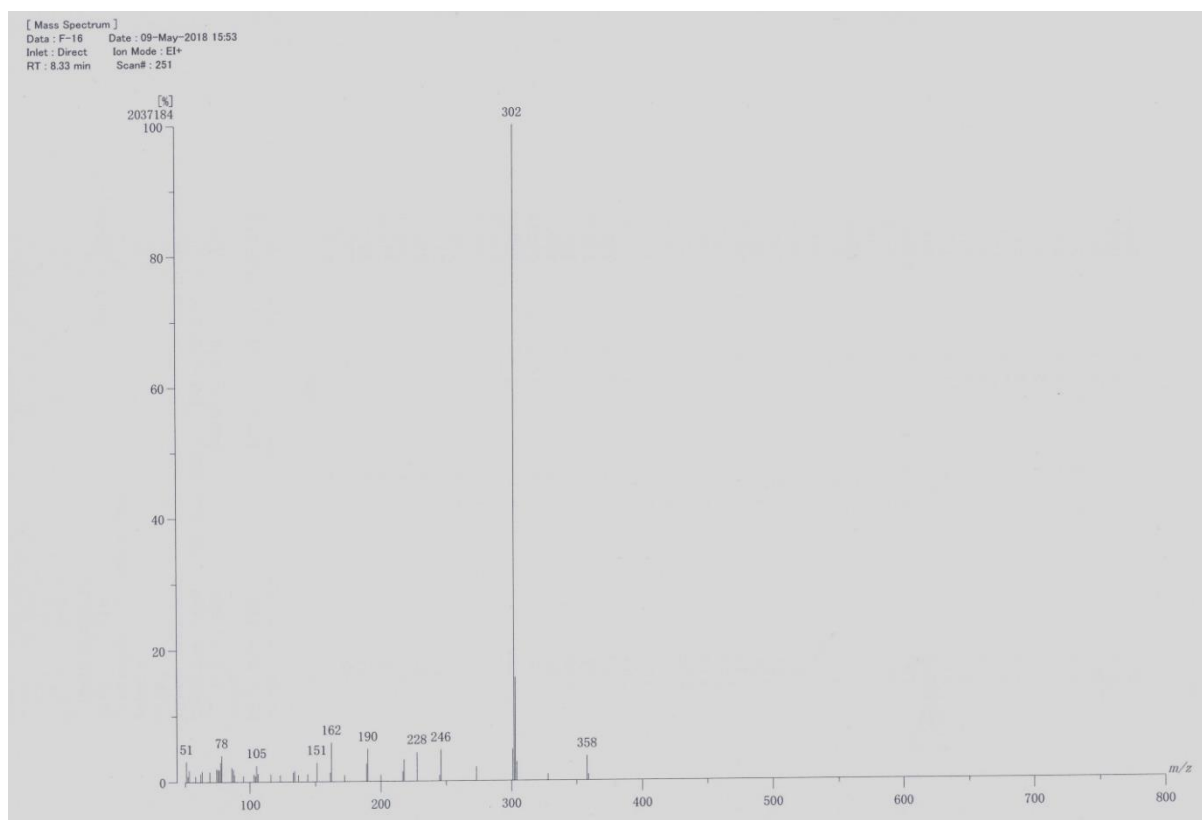

**Figure S15.** EIMS of compound-III (1-Hexyl benzene).
